# Supplementary material for: Peroral Clove Essential Oil Treatment Ameliorates Acute Campylobacteriosis—Results from a Preclinical Murine Intervention Study
Source: MDPI journal article supplement (doi:10.3390/microorganisms9040735), 2021-03-31
Supplement: s1 [file s1]

**Supplementary Figure S1.** Kinetic survey of *C. jejuni* induced clinical signs following clove EO treatment of infected IL-10<sup>-/-</sup> mice. Microbiota-depleted IL-10<sup>-/-</sup> mice were perorally infected with *C. jejuni* strain 81-176 on day (d) 0 and d1. From d2 until d6 post-infection (p.i.), mice were perorally challenged with clove EO or received placebo (PLC) via the drinking water. Pathogen-induced clinical signs such as **(A–D)** the abundance of fecal blood, **(E–H)** diarrhea and **(I–L)** wasting symptoms were quantitatively determined over time by using a clinical scoring system. Naive mice were included as negative control animals. Box plots indicate the 75<sup>th</sup> and the 25<sup>th</sup> percentiles of the median (black bars within box). The total range, significance levels (p values) determined by the Kruskal-Wallis test and Dunn's post-correction and the total numbers of analyzed mice (in parentheses) are given. Data were pooled from four independent experiments.
